# Supplementary material for: Spatial Distribution and Ecological Risks of the Potentially-Toxic Elements in the Surface Sediments of Lake Bosten, China
Source: MDPI journal article supplement (doi:10.3390/toxics8030077), 2020-09-22
Supplement: s2 [file s2]

# Supplementary Materials: Spatial Distribution and Ecological Risks of the Potentially-Toxic Elements in the Surface Sediments of Lake Bosten, China

Long Ma, Jilili Abuduwaili and Wen Liu

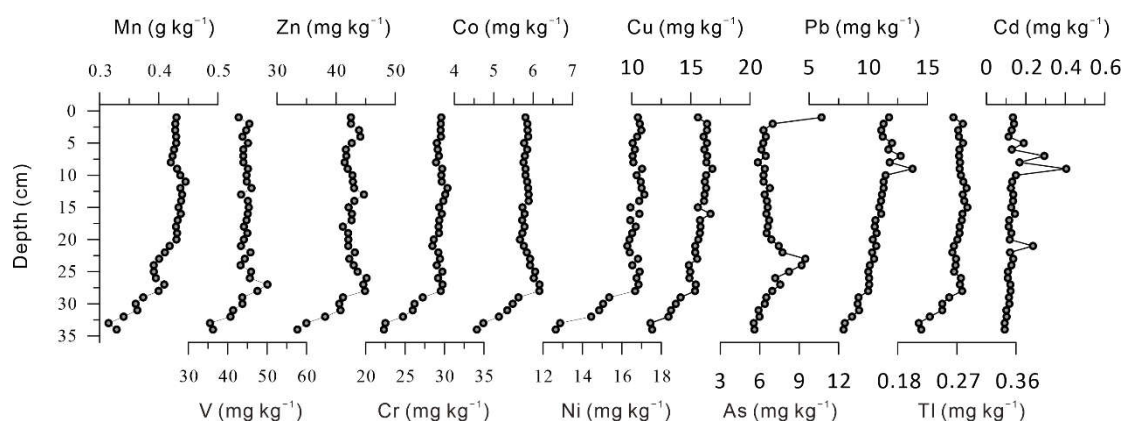

**Figure S1.** The values for the potentially toxic elements in the core sediment of Lake Bosten.

**Table S1.** Geographical coordinates of sampling points.

| Sampling site. | Sediment type | Longitude (°E) | Latitude (°N) |
|----------------|---------------|----------------|---------------|
| 1              | surface       | 86.79850       | 41.94835      |
| 2              | surface       | 86.85553       | 41.97216      |
| 3              | surface       | 86.88277       | 42.01477      |
| 4              | surface       | 86.86965       | 42.06614      |
| 5              | surface       | 86.93248       | 42.06765      |
| 6              | surface       | 86.95416       | 42.02490      |
| 7              | surface       | 87.03997       | 42.02465      |
| 8              | surface       | 87.13220       | 42.01129      |
| 9              | surface       | 87.12680       | 41.99708      |
| 10             | surface       | 87.20416       | 41.98515      |
| 11             | surface       | 87.27553       | 41.98031      |
| 12             | surface       | 87.34146       | 41.87899      |
| 13             | surface       | 87.28428       | 41.90440      |
| 14             | surface       | 87.24369       | 41.92354      |
| 15             | surface       | 87.15228       | 41.94183      |
| 16             | surface       | 87.05464       | 41.94198      |
| 17             | surface       | 86.96651       | 41.92712      |
| 18             | surface       | 86.88876       | 41.91617      |
| 19             | surface       | 86.80401       | 41.92196      |
| 20             | surface       | 86.78840       | 41.89051      |
| 21             | surface       | 86.75706       | 41.88649      |
| 22             | surface       | 86.74919       | 41.92677      |
| 23             | core          | 86.81797       | 41.92775      |

**Table 2.** Grading standards for ecological risk assessment index

| $E_r^i$                | Description                  | PERI                  | Description                  |
|------------------------|------------------------------|-----------------------|------------------------------|
| $E_r^i < 40$           | Low ecological risk          | $PERI < 150$          | Low risk                     |
| $40 \leq E_r^i < 80$   | Moderate ecological risk     | $150 \leq PERI < 300$ | Moderate ecological risk     |
| $80 \leq E_r^i < 160$  | Considerable ecological risk | $300 \leq PERI < 600$ | Considerable ecological risk |
| $160 \leq E_r^i < 320$ | High ecological risk         | $PERI \geq 600$       | Very high ecological risk    |
| $E_r^i > 320$          | Very high ecological risk    | –                     | –                            |

**Table S3.** Statistical characteristics of latent heavy metal elements, particle size, whole rock composition, organic carbon content.

| Compositio<br>n                    | Mean  | Standard<br>Deviation | SE of<br>mean | Coefficient<br>of Variation | Minimu<br>m | Media<br>n | Maximu<br>m |
|------------------------------------|-------|-----------------------|---------------|-----------------------------|-------------|------------|-------------|
| Mn (g/kg)                          | 0.45  | 0.10                  | 0.02          | 0.22                        | 0.20        | 0.46       | 0.63        |
| V (mg/kg)                          | 50.77 | 12.51                 | 2.67          | 0.25                        | 33.00       | 50.50      | 87.00       |
| Cr (mg/kg)                         | 34.15 | 10.55                 | 2.25          | 0.31                        | 17.50       | 34.05      | 62.20       |
| Co (mg/kg)                         | 6.39  | 1.99                  | 0.42          | 0.31                        | 2.60        | 6.80       | 11.10       |
| Ni (mg/kg)                         | 18.11 | 5.13                  | 1.09          | 0.28                        | 7.40        | 18.95      | 29.70       |
| Cu (mg/kg)                         | 17.19 | 5.53                  | 1.18          | 0.32                        | 4.00        | 17.05      | 29.00       |
| Zn (mg/kg)                         | 40.20 | 13.19                 | 2.81          | 0.33                        | 16.70       | 39.80      | 73.20       |
| As (mg/kg)                         | 7.73  | 2.72                  | 0.58          | 0.35                        | 3.90        | 7.05       | 13.70       |
| Cd (mg/kg)                         | 0.12  | 0.03                  | 0.01          | 0.24                        | 0.06        | 0.13       | 0.19        |
| Tl (mg/kg)                         | 0.32  | 0.08                  | 0.02          | 0.27                        | 0.17        | 0.30       | 0.54        |
| Pb (mg/kg)                         | 13.21 | 3.82                  | 0.81          | 0.29                        | 7.30        | 12.70      | 22.40       |
| <4µm (%)                           | 21.86 | 5.47                  | 1.17          | 0.25                        | 9.03        | 23.00      | 32.04       |
| 4~16µm (%)                         | 40.05 | 9.98                  | 2.13          | 0.25                        | 19.21       | 39.84      | 62.07       |
| 16~32µm (%)                        | 18.34 | 3.38                  | 0.72          | 0.18                        | 11.29       | 18.95      | 24.35       |
| 32~63µm (%)                        | 12.74 | 6.90                  | 1.47          | 0.54                        | 1.11        | 11.78      | 31.80       |
| >63µm (%)                          | 7.01  | 5.41                  | 1.15          | 0.77                        | 0.16        | 5.22       | 19.40       |
| Median size (µm)                   | 12.51 | 5.71                  | 1.22          | 0.46                        | 6.45        | 10.07      | 30.25       |
| TOC (g/kg)                         | 32.57 | 8.82                  | 1.88          | 0.27                        | 4.46        | 33.71      | 48.36       |
| SiO <sub>2</sub> (%)               | 31.32 | 8.94                  | 1.91          | 0.29                        | 17.27       | 30.27      | 61.57       |
| Al <sub>2</sub> O <sub>3</sub> (%) | 7.21  | 2.02                  | 0.43          | 0.28                        | 3.46        | 6.98       | 12.32       |
| Fe <sub>2</sub> O <sub>3</sub> (%) | 2.81  | 0.89                  | 0.19          | 0.32                        | 1.32        | 2.80       | 4.97        |
| CaO (%)                            | 24.75 | 5.70                  | 1.21          | 0.23                        | 11.20       | 25.35      | 36.00       |
| Na <sub>2</sub> O (%)              | 1.04  | 0.43                  | 0.09          | 0.41                        | 0.61        | 0.97       | 2.82        |
| K <sub>2</sub> O (%)               | 1.57  | 0.43                  | 0.09          | 0.27                        | 0.76        | 1.53       | 2.62        |
| MgO (%)                            | 2.65  | 0.50                  | 0.11          | 0.19                        | 1.26        | 2.69       | 3.68        |
| BaO (%)                            | 0.05  | 0.01                  | 0.00          | 0.12                        | 0.04        | 0.05       | 0.06        |
| MnO (%)                            | 0.06  | 0.02                  | 0.00          | 0.24                        | 0.03        | 0.06       | 0.09        |
| P <sub>2</sub> O <sub>5</sub> (%)  | 0.11  | 0.02                  | 0.00          | 0.19                        | 0.05        | 0.12       | 0.13        |
| SO <sub>3</sub> (%)                | 1.54  | 0.41                  | 0.09          | 0.26                        | 0.33        | 1.54       | 2.21        |
| TiO <sub>2</sub> (%)               | 0.32  | 0.08                  | 0.02          | 0.26                        | 0.17        | 0.31       | 0.54        |
| LOI <sub>1000</sub> (%)            | 26.89 | 6.08                  | 1.30          | 0.23                        | 9.74        | 27.49      | 38.19       |
